# Supplementary material
Source: publisher figshare collection journal article supplement (https://frontiersin.figshare.com/ndownloader/files/25444256)
Supplement: Supplementary file 1 [file 25444256]

Supplementary Material

**Influence of freshwater discharges on biogeochemistry and benthic communities of a coral reef ecosystem (La Réunion Island, Indian Ocean)**

The supplementary material contains 29 pages, and includes 2 texts, 5 tables and 8 figures.

**Table S1.** Characteristics of the study stations located in La Saline fringing reef system (La Réunion Island, southwestern Indian Ocean) and sampled from 22 February to 13 March 2012.

| **Water type** | **Site/water body name** | **Site abbr.** | **Station/sample name** | **Sample abbr.** | **Position** | **Sampling date** | **Water column depth** | **Sampling depth** |
| --- | --- | --- | --- | --- | --- | --- | --- | --- |
| **Freshwatersa** | Saint Gilles River | SGR | Saint Gilles River 1 | SGR1 | 21° 03.177’ S; 55° 13.656’ E | 22/02/12 | *nd* | 0.1 m |
|  |  |  | Saint Gilles River 2 | SGR2 | 21° 03.177’ S; 55° 13.656’ E | 01/03/12 | *nd* | 0.1 m |
|  | Hermitage River | HR | Hermitage River 1 | HR1 | 21° 05.036’ S; 55° 13.616’ E | 22/02/12 | *nd* | 0.1 m |
|  |  |  | Hermitage River 2 | HR2 | 21° 05.036’ S; 55° 13.616’ E | 01/03/12 | *nd* | 0.1 m |
|  | Trois-Bassins River | 3BR | Trois-Bassins River 1 | 3BR1 | 21° 06.586’ S; 55° 15.332’ E | 22/02/12 | *nd* | 0.1 m |
|  |  |  | Trois-Bassins River 2 | 3BR2 | 21° 06.553’ S; 55° 15.401’ E | 29/02/12 | *nd* | 0.1 m |
|  |  |  | Trois-Bassins River 3 | 3BR3 | 21° 06.553’ S; 55° 15.401’ E | 01/03/12 | *nd* | 0.1 m |
|  | Sand layer groundwater | SL | Sand layer piezometer 1 | SL1 | 21° 04.708’ S; 55° 13.365’ E | 05/03/12 | *nd* | *nd* |
|  |  |  | Sand layer piezometer 2 | SL2 | 21° 04.710’ S; 55° 13.327’ E | 09/03/12 | *nd* | *nd* |
|  | Basalt layer groundwater | BL | Basalt layer piezometer 1 | BL1 | 21° 04.482’ S; 55° 13.837’ E | 29/02/12 | *nd* | *nd* |
|  |  |  | Basalt layer piezometer 2 | BL2 | 21° 04.375’ S; 55° 13.755’ E | 29/02/12 | *nd* | *nd* |
|  |  |  | Basalt layer piezometer 3 | BL3 | 21° 04.367’ S; 55° 13.682’ E | 29/02/12 | *nd* | *nd* |
|  |  |  | Trou d’Eau well | TE | 21° 06.030’ S; 55° 14.670’ E | 05/03/12 | *nd* | *nd* |
|  |  |  | Forage de l’Hermitage | FH | 21° 04.391’ S; 55° 13.960’ E | 13/03/12 | *nd* | *nd* |
|  |  |  | Forage Montée Panon | FM | 21° 06.143’ S; 55° 15.134’ E | 13/03/12 | *nd* | *nd* |
| **Back reef watersb** | Hermitage | HB | Hermitage beach | HB | 21° 05.062’ S; 55° 13.558’ E | 01/03/12 | 1 m | 0.1 m |
|  | Toboggan | TB | Toboggan 1 (beach) | TB1 | 21° 04.824’ S; 55° 13.355’ E | 05/03/12 | 1 m | 0.1 m |
|  |  |  | Toboggan 2 | TB2 | 21° 04.832’ S; 55° 13.346’ E | 05/03/12 | 1 m | 0.1 m |
|  |  |  | Toboggan 3 | TB3 | 21° 04.845’ S; 55° 13.333’ E | 05/03/12 | 1 m | 0.1 m |
|  |  |  | Toboggan 4 | TB4 | 21° 04.857’ S; 55° 13.323’ E | 05/03/12 | 1 m | 0.1 m |
|  |  |  | Toboggan 5 (buoy) | TB5 | 21° 04.867’ S; 55° 13.313’ E | 05/03/12 | 1 m | 0.1 m |
|  | Club Med | CMB | Club Med 1 (beach) | CMB1 | 21° 05.206’ S; 55° 13.644’ E | 10/03/12 | 1 m | 0.1 m |
|  |  |  | Club Med 2 | CMB2 | 21° 05.229’ S; 55° 13.619’ E | 10/03/12 | 1 m | 0.1 m |
|  |  |  | Club Med 3 | CMB3 | 21° 05.230’ S; 55° 13.619’ E | 10/03/12 | 1 m | 0.1 m |
|  |  |  | Club Med 4 | CMB4 | 21° 05.241’ S; 55° 13.600’ E | 10/03/12 | 1 m | 0.1 m |
|  |  |  | Club Med 5 (reef flat) | CMB5 | 21° 05.252’ S; 55° 13.580’ E | 10/03/12 | 1 m | 0.1 m |
|  | Planch’Alizés | PAB | Planch’Alizés 1 (beach) | PAB1 | 21° 05.705’ S; 55° 14.055’ E | 10/03/12 | 1 m | 0.1 m |
|  |  |  | Planch’Alizés 2 | PAB2 | 21° 05.710’ S; 55° 14.049’ E | 10/03/12 | 1 m | 0.1 m |
|  |  |  | Planch’Alizés 3 | PAB3 | 21° 05.718’ S; 55° 14.039’ E | 10/03/12 | 1 m | 0.1 m |
|  |  |  | Planch’Alizés 4 | PAB4 | 21° 05.736’ S; 55° 14.022’ E | 10/03/12 | 1 m | 0.1 m |
|  |  |  | Planch’Alizés 5 (reef flat) | PAB5 | 21° 05.752’ S; 55° 14.007’ E | 10/03/12 | 1 m | 0.1 m |
|  | Trou d’Eau | TEB | Trou d’Eau 1 (beach) | TEB1 | 21° 05.833’ S; 55° 14.269’ E | 06/03/12 | 1 m | 0.1 m |
|  |  |  | Trou d’Eau 2 | TEB2 | 21° 05.845’ S; 55° 14.251’ E | 06/03/12 | 1 m | 0.1 m |
|  |  |  | Trou d’Eau 3 | TEB3 | 21° 05.861’ S; 55° 14.215’ E | 06/03/12 | 1 m | 0.1 m |
|  |  |  | Trou d’Eau 4 | TEB4 | 21° 05.887’ S; 55° 14.187’ E | 06/03/12 | 1 m | 0.1 m |
|  |  |  | Trou d’Eau 5 (reef flat) | TEB5 | 21° 05.910’ S; 55° 14.169’ E | 06/03/12 | 1 m | 0.1 m |
|  | Grand Trou d’Eau | GTB | Grand Trou d’Eau 1 (beach) | GTB1 | 21° 06.154’ S; 55° 14.741’ E | 06/03/12 | 1 m | 0.1 m |
|  |  |  | Grand Trou d’Eau 2 | GTB2 | 21° 06.171’ S; 55° 14.730’ E | 06/03/12 | 1 m | 0.1 m |
|  |  |  | Grand Trou d’Eau 3 | GTB3 | 21° 06.188’ S; 55° 14.715’ E | 06/03/12 | 1 m | 0.1 m |
|  |  |  | Grand Trou d’Eau 4 | GTB4 | 21° 06.209’ S; 55° 14.699’ E | 06/03/12 | 1 m | 0.1 m |
|  |  |  | Grand Trou d’Eau 5 (reef flat) | GTB5 | 21° 06.227’ S; 55° 14.687’ E | 06/03/12 | 1 m | 0.1 m |
| **Fore reef watersc** | Saint Gilles | SGF | Saint Gilles 5-m depth - surface | SGF1 | 21° 03.632’ S; 55° 13.170’ E | 01/03/12 | 5 m | 0.1 m |
|  |  |  | Saint Gilles 5-m depth - slope | SGF2 | 21° 03.632’ S; 55° 13.170’ E | 01/03/12 | 5 m | 5 m |
|  |  |  | Saint Gilles 10-m depth - surface | SGF3 | 21° 03.622’ S; 55° 13.128’ E | 01/03/12 | 10 m | 0.1 m |
|  |  |  | Saint Gilles 10-m depth - slope | SGF4 | 21° 03.622’ S; 55° 13.128’ E | 01/03/12 | 10 m | 10 m |
|  |  |  | Saint Gilles 20-m depth - surface | SGF5 | 21° 03.609’ S; 55° 12.970’ E | 01/03/12 | 20 m | 0.1 m |
|  |  |  | Saint Gilles 20-m depth - slope | SGF6 | 21° 03.609’ S; 55° 12.970’ E | 01/03/12 | 20 m | 20 m |
|  | Poste MNS | PMF | Poste MNS 5-m depth - surface | PMF1 | 21° 04.165’ S; 55° 13.060’ E | 23/02/12 | 5 m | 0.1 m |
|  |  |  | Poste MNS 5-m depth - slope | PMF2 | 21° 04.165’ S; 55° 13.060’ E | 23/02/12 | 5 m | 5 m |
|  |  |  | Poste MNS 10-m depth - surface | PMF3 | 21° 04.177’ S; 55° 13.024’ E | 23/02/12 | 10 m | 0.1 m |
|  |  |  | Poste MNS 10-m depth - slope | PMF4 | 21° 04.177’ S; 55° 13.024’ E | 23/02/12 | 10 m | 10 m |
|  |  |  | Poste MNS 20-m depth - surface | PMF5 | 21° 04.193’ S; 55° 12.942’ E | 23/02/12 | 20 m | 0.1 m |
|  |  |  | Poste MNS 20-m depth - slope | PMF6 | 21° 04.193’ S; 55° 12.942’ E | 23/02/12 | 20 m | 20 m |
|  |  |  | Poste MNS | PMF7 | 21° 04.396’ S; 55° 12.881’ E | 29/02/12 | 20 m | *na* |
|  |  |  | Poste MNS | PMF8 | 21° 04.415’ S; 55° 12.964’ E | 29/02/12 | 13 m | *na* |
|  |  |  | Poste MNS | PMF9 | 21° 04.487’ S; 55° 12.843’ E | 29/02/12 | 20 m | *na* |
|  | Toboggan | TF | Toboggan 5-m depth - surface | TF1 | 21° 04.888’ S; 55° 13.062’ E | 07/03/12 | 5 m | 0.1 m |
|  |  |  | Toboggan 5-m depth - slope | TF2 | 21° 04.888’ S; 55° 13.062’ E | 07/03/12 | 5 m | 5 m |
|  |  |  | Toboggan 10-m depth - surface | TF3 | 21° 04.876’ S; 55° 13.021’ E | 07/03/12 | 10 m | 0.1 m |
|  |  |  | Toboggan 10-m depth - slope | TF4 | 21° 04.876’ S; 55° 13.021’ E | 07/03/12 | 10 m | 10 m |
|  |  |  | Toboggan 20-m depth - surface | TF5 | 21° 04.840’ S; 55° 12.917’ E | 07/03/12 | 20 m | 0.1 m |
|  |  |  | Toboggan 20-m depth - slope | TF6 | 21° 04.840’ S; 55° 12.917’ E | 07/03/12 | 20 m | 20 m |
|  |  |  | Toboggan 12-m depth | TF7 | 21° 05.056’ S; 55° 13.078’ E | 29/02/12 | 12 m | *na* |
|  |  |  | Toboggan 20-m depth | TF8 | 21° 05.072’ S; 55° 13.048’ E | 29/02/12 | 20 m | *na* |
|  | Hermitage | HF | Hermitage 5-m depth - surface | HF1 | 21° 05.117’ S; 55° 13.231’ E | 01/03/12 | 5 m | 0.1 m |
|  |  |  | Hermitage 5-m depth - slope | HF2 | 21° 05.117’ S; 55° 13.231’ E | 01/03/12 | 5 m | 5 m |
|  |  |  | Hermitage 10-m depth - surface | HF3 | 21° 05.156’ S; 55° 13.201’ E | 01/03/12 | 10 m | 0.1 m |
|  |  |  | Hermitage 10-m depth - slope | HF4 | 21° 05.156’ S; 55° 13.201’ E | 01/03/12 | 10 m | 10 m |
|  |  |  | Hermitage 20-m depth - surface | HF5 | 21° 05.185’ S; 55° 13.154’ E | 01/03/12 | 20 m | 0.1 m |
|  |  |  | Hermitage 20-m depth - slope | HF6 | 21° 05.185’ S; 55° 13.154’ E | 01/03/12 | 20 m | 20 m |
|  |  |  | Hermitage 11-m depth | HF7 | 21° 05.260’ S; 55° 13.281’ E | 29/02/12 | 11 m | *na* |
|  | Camp des Finances | CFF | Camp Finances 5-m depth - surface | CFF1 | 21° 05.614’ S; 55° 13.533’ E | 07/03/12 | 5 m | 0.1 m |
|  |  |  | Camp Finances 5-m depth - slope | CFF2 | 21° 05.614’ S; 55° 13.533’ E | 07/03/12 | 5 m | 5 m |
|  |  |  | Camp Finances 10-m depth - surface | CFF3 | 21° 05.685’ S; 55° 13.550’ E | 07/03/12 | 10 m | 0.1 m |
|  |  |  | Camp Finances 10-m depth - slope | CFF4 | 21° 05.685’ S; 55° 13.550’ E | 07/03/12 | 10 m | 10 m |
|  |  |  | Camp Finances 20-m depth - surface | CFF5 | 21° 05.731’ S; 55° 13.468’ E | 07/03/12 | 20 m | 0.1 m |
|  |  |  | Camp Finances 20-m depth - slope | CFF6 | 21° 05.731’ S; 55° 13.468’ E | 07/03/12 | 20 m | 20 m |
|  | Planch’Alizés | PAF | Planch’Alizés 5-m depth - surface | PAF1 | 21° 05.905’ S; 55° 13.816’ E | 25/02/12 | 5 m | 0.1 m |
|  |  |  | Planch’Alizés 5-m depth - slope | PAF2 | 21° 05.905’ S; 55° 13.816’ E | 25/02/12 | 5 m | 5 m |
|  |  |  | Planch’Alizés 10-m depth - surface | PAF3 | 21° 05.929’ S; 55° 13.790’ E | 25/02/12 | 10 m | 0.1 m |
|  |  |  | Planch’Alizés 10-m depth - slope | PAF4 | 21° 05.929’ S; 55° 13.790’ E | 25/02/12 | 10 m | 10 m |
|  |  |  | Planch’Alizés 20-m depth - surface | PAF5 | 21° 05.989’ S; 55° 13.739’ E | 25/02/12 | 20 m | 0.1 m |
|  |  |  | Planch’Alizés 20-m depth - slope | PAF6 | 21° 05.989’ S; 55° 13.739’ E | 25/02/12 | 20 m | 20 m |
|  |  |  | Planch’Alizés 11-m depth | PAF7 | 21° 05.865’ S; 55° 13.691’ E | 29/02/12 | 11 m | *na* |
|  | BS4 | BSF | BS4 5-m depth - surface | BSF1 | 21° 06.292’ S; 55° 14.334’ E | 24/02/12 | 5 m | 0.1 m |
|  |  |  | BS4 5-m depth - slope | BSF2 | 21° 06.292’ S; 55° 14.334’ E | 24/02/12 | 5 m | 5 m |
|  |  |  | BS4 10-m depth - surface | BSF3 | 21° 06.333’ S; 55° 14.285’ E | 24/02/12 | 10 m | 0.1 m |
|  |  |  | BS4 10-m depth - slope | BSF4 | 21° 06.333’ S; 55° 14.285’ E | 24/02/12 | 10 m | 10 m |
|  |  |  | BS4 20-m depth - surface | BSF5 | 21° 06.373’ S; 55° 14.193’ E | 24/02/12 | 20 m | 0.1 m |
|  |  |  | BS4 20-m depth - slope | BSF6 | 21° 06.373’ S; 55° 14.193’ E | 24/02/12 | 20 m | 20 m |
|  | Sud Sanctuaire | SSF | Sud Sanctuaire 5-m depth - surface | SSF1 | 21° 06.532’ S; 55° 14.790’ E | 07/03/12 | 5 m | 0.1 m |
|  |  |  | Sud Sanctuaire 5-m depth - slope | SSF2 | 21° 06.532’ S; 55° 14.790’ E | 07/03/12 | 5 m | 5 m |
|  |  |  | Sud Sanctuaire 10-m depth - surface | SSF3 | 21° 06.587’ S; 55° 14.798’ E | 07/03/12 | 10 m | 0.1 m |
|  |  |  | Sud Sanctuaire 10 m depth - slope | SSF4 | 21° 06.587’ S; 55° 14.798’ E | 07/03/12 | 10 m | 10 m |
|  |  |  | Sud Sanctuaire 20-m depth - surface | SSF5 | 21° 06.598’ S; 55° 14.736’ E | 07/03/12 | 20 m | 0.1 m |
|  |  |  | Sud Sanctuaire 20-m depth - slope | SSF6 | 21° 06.598’ S; 55° 14.736’ E | 07/03/12 | 20 m | 20 m |
|  | Trois-Bassins | 3BF | Trois-Bassins 5-m depth - surface | 3BF1 | 21° 06.694’ S; 55° 14.946’ E | 23/02/12 | 5 m | 0.1 m |
|  |  |  | Trois-Bassins 5-m depth - slope | 3BF2 | 21° 06.694’ S; 55° 14.946’ E | 23/02/12 | 5 m | 5 m |
|  |  |  | Trois-Bassins 10-m depth - surface | 3BF3 | 21° 06.702’ S; 55° 14.935’ E | 23/02/12 | 10 m | 0.1 m |
|  |  |  | Trois-Bassins 10-m depth - slope | 3BF4 | 21° 06.702’ S; 55° 14.935’ E | 23/02/12 | 10 m | 10 m |
|  |  |  | Trois-Bassins 20-m depth - surface | 3BF5 | 21° 06.726’ S; 55° 14.865’ E | 23/02/12 | 20 m | 0.1 m |
|  |  |  | Trois-Bassins 20-m depth - slope | 3BF6 | 21° 06.726’ S; 55° 14.865’ E | 23/02/12 | 20 m | 20 m |
|  |  |  | Trois-Bassins 12-m depth | 3BF7 | 21° 06.743’ S; 55° 15.007’ E | 29/02/12 | 12 m | *na* |
|  |  |  | Trois-Bassins 20-m depth | 3BF8 | 21° 06.858’ S; 55° 14.923’ E | 29/02/12 | 20 m | *na* |
| **Oceanic watersd** | Saint Gilles harbour | SGH | Saint Gilles harbour 13-m depth - surface | SGH1 | 21° 03.245’ S; 55° 13.206’ E | 27/02/12 | 13 m | 0.1 m |
|  |  |  | Saint Gilles harbour 20-m depth | SGH2 | 21° 03.218’ S; 55° 13.097’ E | 27/02/12 | 20 m | *na* |
|  |  |  | Saint Gilles harbour 50-m depth | SGH3 | 21° 03.312’ S; 55° 12.303’ E | 29/02/12 | 50 m | *na* |
|  | Saint Gilles | SGO | Saint Gilles 50-m depth | SGO | 21° 03.621’ S; 55° 12.86’ E | 27/02/12 | 50 m | *na* |
|  | Poste MNS | PMO | Poste MNS 50-m depth | PMO1 | 21° 04.274’ S; 55° 12.422’ E | 27/02/12 | 50 m | *na* |
|  |  |  | Poste MNS 60-m depth - surface | PMO2 | 21° 04.327’ S; 55° 11.831’ E | 27/02/12 | 60 m | 0.1 m |
|  |  |  | Poste MNS 50-m depth | PMO3 | 21° 04.519’ S; 55° 12.437’ E | 29/02/12 | 50 m | *na* |
|  | Toboggan | TO | Toboggan 50-m depth | TO | 21° 05.201’ S; 55° 12.423’ E | 29/02/12 | 50 m | *na* |
|  | Hermitage | HO | Hermitage 50-m depth | HO | 21° 05.418’ S; 55° 12.514’ E | 27/02/12 | 50 m | *na* |
|  | Camp des Finances | CFO | Camp Finances 50-m depth | CFO1 | 21° 05.877’ S; 55° 13.040’ E | 27/02/12 | 50 m | *na* |
|  |  |  | Camp Finances 50-m depth | CFO2 | 21° 05.973’ S; 55° 13.063’ E | 29/02/12 | 50 m | *na* |
|  | Planch’Alizés | PAO | Planch’Alizés 80-m depth - surface | PAO1 | 21° 06.404’ S; 55° 13.117’ E | 27/02/12 | 80 m | 0.1 m |
|  |  |  | Planch’Alizés 50-m depth | PAO2 | 21° 06.180’ S; 55° 13.285’ E | 27/02/12 | 50 m | *na* |
|  |  |  | Planch’Alizés 50-m depth | PAO3 | 21° 06.228’ S; 55° 13.420’ E | 27/02/12 | 50 m | *na* |
|  | BS4 | BSO | BS4 50-m depth | BSO | 21° 06.530’ S; 55° 13.937’ E | 27/02/12 | 50 m | *na* |
|  | Sud Sanctuaire | SSO | Sud Sanctuaire 50-m depth | SSO | 21° 06.972’ S; 55° 14.803’ E | 29/02/12 | 50 m | *na* |
|  | Trois-Bassins | 3BO | Trois-Bassins 80-m depth - surface | 3BO | 21° 07.119’ S; 55° 14.521’ E | 27/02/12 | 80 m | 0.1 m |

*nd*: not determined; *na*: not applicable because water sampling was not conducted.

**a** In freshwaters: water sampling (at the surface, i.e., 0.1-m depth for river waters, but unknown sampling depth for groundwater) for measurements of salinity and biogeochemical parameters (all samples); No conductivity-temperature-depth (CTD) *in situ* measurements; Among biogeochemical parameters, total chlorophyll *a* (TChl *a*) and phaeopigment *a* (Pheo *a*) concentrations were not determined in groundwater samples (SL1, 2, BL1-3, TE, FH, FM).

**b** In back reef waters: water sampling at the surface for measurements of salinity and biogeochemical parameters (all samples); *In situ* measurements with the CTD probe deployed horizontally at the surface from the beach to reef flat (all samples except HB); Ammonium (NH4+), phosphate (PO43-), dissolved organic nitrogen (DON), urea, TChl *a* and Pheo *a* concentrations were not determined on discrete samples, except for HB; TChl *a* concentration data used are those from the CTD probe.

**c** In fore reef waters: water sampling both at the surface (all samples n° 1, 3, 5) and the bottom (onto the slope; all samples n° 2, 4, 6) over 5-, 10- and 20-m depths for measurements of salinity and biogeochemical parameters; Fore reef sites located north of the Hermitage river (SGF, PMF, TF and HF) are considered belonging to the northern part of the reef, while those located south of the Hermitage river (CFF, PAF, BSF, SSF and 3BF) are considered belonging to the southern part of the reef. Sampling of benthic communities onto the slope at 10-m depth (all samples n° 4); Depending on the site, *in situ* measurements with the CTD probe deployed vertically conducted over 10- and 20-m depths (PMF3-6, CFF3-6, PAF3-6, BSF3-6, SSF3-6, 3BF3-6), over 10-m depth only (HF3, 4), or over 20-m depth only (SGF5, 6); CTD vertical profiles performed at some additional stations in these sites (but without water/biological sampling) over 12- and/or 20-m depths (PMF7-9, TF7, 8, HF7, PAF7, 3BF7, 8).

**d** In oceanic waters: water sampling at the surface for measurements of salinity and biogeochemical parameters (SGH1, PMO2, PAO1, 3BO); CTD vertical profiles over 13- to 80-m depths (all stations).

**Text S1: Detailed sampling for the different water bodies**

**Freshwaters.** Water samples from the St Gilles River (SGR1, 2) were taken near a collection site for drinking water, water samples from the Hermitage River (HR1, 2), downstream the wastewater treatment plant, and those from the Trois-Bassins River (3BR1-3), few hundred meters upstream of the beach. Groundwater samples from the sedimentary formations (sand layer groundwater, SL) were obtained from two piezometers (SL1, 2) located on the north of Hermitage River. Groundwater samples from the volcanic aquifer (basalt layer groundwater, BL) were collected from three piezometers (BL1-3), a natural well formed by the collapse of a lava tunnel (TE), and two drillings (FH, FM) (**Figure 1**; **Supplementary Table S1**). While river samples were taken at the surface (at ~ 0.1-m depth) directly with the polycarbonate bottles, groundwater samples were retrieved in these bottles through the use of a peristaltic pump with silicon tubing. The latter was extensively washed with 1 M HCl and ultrapure water before use, and then with the respective sample before filling the bottle for its first rinsing.

**Back reef waters.** Water samples were collected with the help of an inflatable boat from the beach to the reef flat at five sites (5 samples by site) distributed from north to south: Toboggan (TB1-5), Club Med (CMB1-5), Planch’Alizés (PAB1-5), Trou d’Eau (TEB1-5) and Grand Trou d’Eau (GTB1-5). One sample was also taken at the Hermitage beach (HB), between TB and CMB transects (**Figure 1**; **Supplementary Table S1**). As river samples, back reef samples were collected at the surface (~ 0.1-m depth) directly with the polycarbonate bottles. The CTD probe was deployed horizontally at ~ 0.1-m depth from the beach to the reef flat at the five sites. To do so, the probe was configured in horizontal mount, i.e., with the exhaust outlet of the pump up-oriented, equipped with small buoys, and manually towed.

**Fore reef waters/reef slope.** Water and benthic communities were sampled along the outer reef slope at nine sites distributed from north to south: Saint Gilles (SGF1-6), Poste MNS (PMF1-6), Toboggan (TF1-6), Hermitage (HF1-6), Camp des Finances (CFF1-6), Planch’Alizés (PAF1-6), BS4 (BSF1-6), Sud Sanctuaire (SSF1-6) and Trois-Bassins (3BF1-6) (**Figure 1**; **Supplementary Table S1**). Some of these sites correspond to reference pilot sites, known for many years as being subject to environmental disturbances (anthropogenic or natural), and/or having specific resistance/resilience capacities (Conand et al., 2000; Bruggemann et al., 2008). These sites were also chosen according to the reef geomorphology over the -10/-12 m horizon, which is a representative area for its high potential for bio-construction onto the external slope (Battistini et al., 1975; Montaggioni and Faure, 1980; Naïm, 1989).

At each site, water samples were collected both at the surface (~ 0.1-m depth) and the bottom (i.e., onto the slope) over 5-, 10- and 20-m depths, so that six water samples were taken by site: samples n° 1, 3, 5 (collection at the surface over 5-, 10- and 20-m depths) and samples n° 2, 4, 6 (collection onto the slope at 5-, 10- and 20-m depths) (**Supplementary Table S1**). Water samples were collected by divers, either directly with the polycarbonate bottles for surface samples, or through the use of a 5-L Niskin bottle equipped with silicon ribbons and Viton o-rings (to avoid organic contaminations) for bottom samples. SGF, PMF, TF and HF sites, located north of the Hermitage river, are considered belonging to the north part of the reef, while CFF, PAF, BSF, SSF and 3BF sites, located south of the Hermitage river, are considered belonging to the south part of the reef.

Along with sampling, the CTD probe was deployed vertically from the surface to the bottom from the R/V *Explorer* in most of these sites over 10- and 20-m depths (PMF3-6, CFF3-6, PAF3-6, BSF3-6, SSF3-6, 3BF3-6), over 10-m depth only (HF3, 4), or over 20-m depth only (SGF5, 6). In addition, CTD profiles were performed at some additional stations of these sites (without discrete sampling) over 12- and/or 20-m depths: PMF7-9, TF7, 8, HF7, PAF7, 3BF7, 8 (**Supplementary Table S1**).

**Oceanic waters.** CTD vertical profiles with or without water sampling were carried out over 13- to 80-m depths from the R/V Explorer in oceanic waters, off the reef slope, at ten sites distributed from north to south: Saint Gilles harbour (SGH1-3), Saint Gilles (SGO), Poste MNS (PMO1-3), Toboggan (TO), Hermitage (HO), Camp des Finances (CFO1, 2), Planch’Alizés (PAO1-3), BS4 (BSO), Sud Sanctuaire (SSO) and Trois-Bassins (3BO). Water samples were collected at the surface (~ 0.1-m depth) in the polycarbonate bottles via the 5-L Niskin bottle at SGH1, PMO2, PAO1 and 3BO (**Figure 1**; **Supplementary Table S1**).

**References**

Battistini, R., Bourrouilh, F., Chevalier, J. P., Coudray, J., Denizot, M., Faure, G., et al. (1975). Eléments de terminologie récifale indo-pacifique. Thetys, 7, 1-111.

Bruggemann, H., Guillaume, M., Bigot, L., Chabanet, P., Denis, V., Durville, P., et al. (2008). Mise en oeuvre du suivi de l’effet réserve : Développement des protocoles et établissement de l’état initial de la Réserve naturelle nationale marine de la Réunion (secteurs de la Saline - Souris Blanche et de Saint-Leu). Rapport UR/MNHN/AR/APMR, 74 p.

Conand, C., Lame, M., Quod, I.-P., Conand, F., and Turquet, J. (2000). Bleaching in a Western Indian Ocean Island, La Réunion: a multi-scale approach. In: Proceedings of the 9th International Coral Reef Symposium. Moosa, M.K., Soemodihardjo, S., Soegiarto, A., Romimohtarto, K., Nontji, A., Suharsono, S. (Eds). Indonesian Institute of Sciences, International Society for Reef Studies. Bali, Indonesia, Vol. 2, p. 1155–1160. Montaggioni, L.F., Faure, G., 1980. Les récifs coralliens des Mascareignes (Océan Indien). Centre Universitaire de la Réunion, ISSN O337100 X, 143 p.

Naïm, O. (1989). Les platiers récifaux de l’île de la Réunion. Géomorphologie, contexte hydrodynamique et peuplements benthiques. Rapport AUR, Laboratoire d’Écologie marine, Université de la Réunion. Saint-Denis, France, 150 p.

**Table S2.** Salinity and biogeochemical parameters for the different samples collected in La Saline fringing reef system.

| **Samples** | **Salinity** | **Si(OH)4 (µM)** | **NO3- (µM)** | **NO2- (µM)** | **NH4+ (µM)** | **PO43- (µM)** | **DOC (µM)** | **DON (µM)** | **Urea (µM)** | **Humic (QSU)** | **Trypt. (QSU)** | **TChl *a* (µg L-1)a** | **Pheo *a* (µg L-1)** |
| --- | --- | --- | --- | --- | --- | --- | --- | --- | --- | --- | --- | --- | --- |
| SGR1 | 0.09 | 695 | 116 | 1.00 | 7.53 | 1.69 | 61.5 | 7.90 | 0.27 | 120 | 118 | 1.29 | 0.66 |
| SGR2 | 0.15 | 700 | 123 | 0.31 | 1.50 | 1.54 | 57.5 | 9.30 | 0.24 | 103 | 87.0 | 0.34 | 0.22 |
| HR1 | 0.63 | 749 | 100 | 2.58 | 5.83 | 2.26 | 396 | 42.2 | 0.99 | 1095 | 924 | 16.6 | 6.72 |
| HR2 | 0.83 | 729 | 63.1 | 1.67 | 2.44 | 4.92 | 393 | 41.5 | 0.74 | 893 | 951 | 19.4 | 5.49 |
| 3BR1 | 27.12 | 147 | 15.7 | 1.00 | 22.8 | 0.22 | 266 | 10.2 | 0.23 | 663 | 179 | 9.03 | 2.45 |
| 3BR2 | 27.87 | 126 | 5.59 | 1.02 | 23.0 | 0.21 | 338 | 14.4 | 0.32 | 1038 | 179 | 13.7 | 4.70 |
| 3BR3 | 25.98 | 149 | 10.6 | 1.13 | 31.5 | 0.19 | 273 | 11.3 | 0.52 | 798 | 196 | 17.1 | 3.44 |
| SL1 | 5.74 | 614 | 1.51 | 1.57 | 17.1 | 1.36 | 309 | 15.8 | 0.14 | 1119 | 218 | *nd* | *nd* |
| SL2 | 6.01 | 582 | 0.08 | 0.07 | 23.8 | 1.08 | 245 | 12.8 | 0.32 | 996 | 208 | *nd* | *nd* |
| BL1 | 0.30 | 1251 | 797 | 0.06 | 0.08 | 5.35 | 38.2 | 0.00 | 0.04 | 54.4 | 68.5 | *nd* | *nd* |
| BL2 | 0.33 | 987 | 442 | 0.04 | 0.09 | 2.80 | 42.9 | 4.30 | 0.04 | 77.2 | 63.1 | *nd* | *nd* |
| BL3 | 0.24 | 940 | 289 | 0.03 | 0.09 | 3.21 | 27.2 | 1.30 | 0.05 | 38.0 | 75.8 | *nd* | *nd* |
| TE | 0.67 | 951 | 477 | 0.08 | 0.17 | 2.90 | 42.9 | 2.40 | 0.49 | 32.7 | 6.40 | *nd* | *nd* |
| FH | 0.25 | 1060 | 480 | 0.03 | 0.08 | 3.28 | 25.1 | 7.40 | 0.05 | 18.3 | 18.0 | *nd* | *nd* |
| FM | 0.37 | 849 | 272 | 0.06 | 0.00 | 1.86 | 27.3 | 1.80 | 0.04 | 4.60 | 41.9 | *nd* | *nd* |
| HB | 28.48 | 162 | 20.4 | 0.66 | 2.69 | 0.99 | 142 | 9.70 | 0.41 | 247 | 251 | 3.89 | 0.88 |
| TB1 | 35.57 | 3.21 | 0.45 | 0.07 | *nd* | *nd* | 69.5 | *nd* | *nd* | 5.60 | 33.0 | 0.19 | *nd* |
| TB2 | 35.70 | 2.05 | 0.56 | 0.07 | *nd* | *nd* | 68.4 | *nd* | *nd* | 6.50 | 21.2 | 0.18 | *nd* |
| TB3 | 35.56 | 2.27 | 0.52 | 0.07 | *nd* | *nd* | 64.9 | *nd* | *nd* | 6.30 | 22.5 | 0.19 | *nd* |
| TB4 | 35.68 | 2.10 | 0.24 | 0.07 | *nd* | *nd* | 72.1 | *nd* | *nd* | 5.80 | 23.3 | 0.17 | *nd* |
| TB5 | 35.63 | 2.16 | 0.40 | 0.09 | *nd* | *nd* | 60.1 | *nd* | *nd* | 5.50 | 25.9 | 0.18 | *nd* |
| CMB1 | 35.40 | 6.29 | 1.01 | 0.15 | *nd* | *nd* | 74.7 | *nd* | *nd* | 12.9 | 23.0 | 0.46 | *nd* |
| CMB2 | 35.54 | 2.47 | 0.46 | 0.14 | *nd* | *nd* | 68.0 | *nd* | *nd* | 11.4 | 18.7 | 0.39 | *nd* |
| CMB3 | 35.56 | 2.25 | 0.91 | 0.15 | *nd* | *nd* | 72.6 | *nd* | *nd* | 9.60 | 30.2 | 0.34 | *nd* |
| CMB4 | 35.61 | 2.27 | 0.60 | 0.12 | *nd* | *nd* | 61.0 | *nd* | *nd* | 11.6 | 21.6 | 0.49 | *nd* |
| CMB5 | 35.57 | 2.27 | 1.00 | 0.12 | *nd* | *nd* | 65.6 | *nd* | *nd* | 15.2 | 30.0 | 0.37 | *nd* |
| PAB1 | 34.67 | 27.0 | 7.51 | 0.24 | *nd* | *nd* | 96.5 | *nd* | *nd* | 16.9 | 40.9 | 0.64 | *nd* |
| PAB2 | 34.85 | 22.3 | 5.74 | 0.23 | *nd* | *nd* | *nd* | *nd* | *nd* | 10.8 | 18.1 | 0.33 | *nd* |
| PAB3 | 35.37 | 9.44 | 1.66 | 0.18 | *nd* | *nd* | 95.9 | *nd* | *nd* | 16.8 | 26.8 | 0.28 | *nd* |
| PAB4 | 35.50 | 5.32 | 1.14 | 0.15 | *nd* | *nd* | 98.5 | *nd* | *nd* | 12.9 | 31.5 | 0.29 | *nd* |
| PAB5 | 35.55 | 3.18 | 0.46 | 0.14 | *nd* | *nd* | 86.0 | *nd* | *nd* | 17.9 | 24.0 | 0.30 | *nd* |
| TEB1 | 33.49 | 64.6 | 17.0 | 0.23 | *nd* | *nd* | 71.6 | *nd* | *nd* | 19.5 | 21.7 | 0.47 | *nd* |
| TEB2 | 35.40 | 8.69 | 3.26 | 0.22 | *nd* | *nd* | 78.7 | *nd* | *nd* | 17.0 | 83.8 | 0.47 | *nd* |
| TEB3 | 35.69 | 2.22 | 1.47 | 0.17 | *nd* | *nd* | 77.4 | *nd* | *nd* | 13.8 | 48.0 | 0.32 | *nd* |
| TEB4 | 35.63 | 1.99 | 1.18 | 0.14 | *nd* | *nd* | 80.6 | *nd* | *nd* | 7.90 | 72.0 | 0.29 | *nd* |
| TEB5 | 35.62 | 1.96 | 1.18 | 0.12 | *nd* | *nd* | 76.5 | *nd* | *nd* | 6.80 | 147 | 0.33 | *nd* |
| GTB1 | 34.88 | 28.9 | 9.38 | 0.26 | *nd* | *nd* | 70.6 | *nd* | *nd* | 24.4 | 124 | 0.59 | *nd* |
| GTB2 | 35.39 | 11.1 | 4.89 | 0.15 | *nd* | *nd* | 68.2 | *nd* | *nd* | 12.8 | 32.1 | 0.35 | *nd* |
| GTB3 | 35.52 | 4.04 | 1.06 | 0.12 | *nd* | *nd* | 90.8 | *nd* | *nd* | 12.0 | 48.0 | 0.26 | *nd* |
| GTB4 | 35.53 | 3.78 | 1.38 | 0.12 | *nd* | *nd* | 69.3 | *nd* | *nd* | 12.0 | 26.6 | 0.27 | *nd* |
| GTB5 | 35.57 | 3.13 | 1.05 | 0.16 | *nd* | *nd* | 76.6 | *nd* | *nd* | 14.2 | 67.9 | 0.29 | *nd* |
| SGF1 | 35.58 | 2.27 | 0.51 | 0.05 | 0.25 | 0.13 | 75.4 | 3.95 | 0.09 | 3.94 | 39.0 | 0.10 | 0.07 |
| SGF2 | 35.58 | 2.24 | 0.32 | 0.03 | 0.16 | 0.11 | 70.0 | 4.07 | 0.06 | 1.54 | 38.3 | 0.09 | 0.08 |
| SGF3 | 35.58 | 2.41 | 0.46 | 0.06 | 0.21 | 0.12 | 80.5 | 4.09 | 0.11 | 9.00 | 102 | 0.10 | 0.05 |
| SGF4 | 35.60 | 2.07 | 0.15 | 0.03 | 0.16 | 0.10 | 78.7 | 4.15 | 0.06 | 2.26 | 56.0 | 0.05 | 0.03 |
| SGF5 | 35.58 | 2.21 | 0.40 | 0.06 | 0.27 | 0.13 | 78.2 | 4.24 | 0.10 | 5.47 | 46.5 | 0.06 | 0.03 |
| SGF6 | 35.60 | 2.04 | 0.03 | 0.02 | 0.11 | 0.08 | 79.0 | 4.44 | 0.06 | 2.18 | 30.8 | 0.08 | 0.04 |
| PMF1 | 35.50 | 3.49 | 0.91 | 0.06 | 0.31 | 0.10 | 70.9 | 4.16 | 0.09 | 9.94 | 24.0 | 0.11 | 0.08 |
| PMF2 | 35.57 | 2.15 | 0.28 | 0.04 | 0.21 | 0.10 | 68.9 | 4.04 | 0.07 | 6.04 | 19.7 | 0.11 | 0.06 |
| PMF3 | 35.60 | 2.13 | 0.44 | 0.05 | 0.39 | 0.10 | 63.6 | 4.21 | 0.09 | 8.07 | 21.6 | 0.06 | 0.03 |
| PMF4 | 35.59 | 2.13 | 0.28 | 0.04 | 0.21 | 0.09 | 71.2 | 4.33 | 0.06 | 5.75 | 19.1 | 0.23 | 0.09 |
| PMF5 | 35.59 | 2.13 | 0.35 | 0.06 | 0.32 | 0.12 | 62.8 | 4.32 | 0.10 | 11.7 | 26.4 | 0.11 | 0.06 |
| PMF6 | 35.59 | 2.21 | 0.16 | 0.03 | 0.17 | 0.09 | 72.8 | 4.23 | 0.08 | 7.25 | 29.7 | 0.15 | 0.06 |
| TF1 | 35.55 | 2.13 | 0.30 | 0.04 | 0.14 | 0.10 | 71.9 | 4.36 | 0.06 | 2.87 | 19.0 | 0.06 | 0.02 |
| TF2 | 35.59 | 2.29 | 0.44 | 0.05 | 0.14 | 0.12 | 71.5 | 4.31 | 0.07 | 4.81 | 22.1 | 0.13 | 0.06 |
| TF3 | 35.55 | 2.13 | 0.19 | 0.04 | 0.12 | 0.10 | 73.1 | 4.35 | 0.06 | 4.00 | 45.9 | 0.15 | 0.05 |
| TF4 | 35.60 | 2.21 | 0.39 | 0.05 | 0.12 | 0.12 | 68.2 | 4.15 | 0.07 | 3.22 | 19.4 | 0.07 | 0.03 |
| TF5 | 35.51 | 2.18 | 0.14 | 0.04 | 0.10 | 0.09 | 77.2 | 4.37 | 0.06 | 3.64 | 33.9 | 0.07 | 0.03 |
| TF6 | 35.56 | 2.10 | 0.12 | 0.04 | 0.10 | 0.08 | 70.6 | 4.41 | 0.11 | 4.25 | 23.5 | 0.08 | 0.03 |
| HF1 | 35.53 | 3.29 | 0.71 | 0.09 | 0.34 | 0.13 | 66.4 | 4.02 | 0.10 | 10.9 | 55.2 | 0.06 | 0.04 |
| HF2 | 35.61 | 2.24 | 0.60 | 0.06 | 0.21 | 0.12 | 62.8 | 3.90 | 0.09 | 7.74 | 53.9 | 0.07 | 0.05 |
| HF3 | 35.53 | 2.98 | 0.66 | 0.09 | 0.29 | 0.13 | 76.0 | 4.12 | 0.10 | 12.5 | 131 | 0.07 | 0.05 |
| HF4 | 35.61 | 2.30 | 0.36 | 0.04 | 0.16 | 0.12 | 68.3 | 4.05 | 0.08 | 8.02 | 99.0 | 0.04 | 0.03 |
| HF5 | 35.53 | 3.12 | 0.67 | 0.09 | 0.32 | 0.13 | 66.9 | 4.11 | 0.12 | 11.9 | 62.7 | 0.05 | 0.03 |
| HF6 | 35.61 | 2.47 | 0.21 | 0.03 | 0.14 | 0.10 | 67.5 | 4.30 | 0.06 | 7.29 | 41.6 | 0.09 | 0.03 |
| CFF1 | 35.58 | 2.13 | 0.39 | 0.06 | 0.16 | 0.11 | 72.7 | 4.25 | 0.06 | 4.47 | 17.2 | 0.06 | 0.03 |
| CFF2 | 35.57 | 2.15 | 0.44 | 0.06 | 0.17 | 0.12 | 78.5 | 4.11 | 0.06 | 5.44 | 24.1 | 0.07 | 0.05 |
| CFF3 | 35.50 | 2.15 | 0.30 | 0.05 | 0.15 | 0.10 | 73.3 | 4.19 | 0.09 | 5.33 | 30.7 | 0.09 | 0.03 |
| CFF4 | 35.55 | 2.15 | 0.35 | 0.05 | 0.13 | 0.10 | 75.3 | 4.11 | 0.06 | 5.41 | 26.4 | 0.03 | 0.02 |
| CFF5 | 35.53 | 2.21 | 0.08 | 0.04 | 0.09 | 0.08 | 76.9 | 4.33 | 0.07 | 5.20 | 34.0 | 0.07 | 0.02 |
| CFF6 | 35.54 | 2.10 | 0.14 | 0.04 | 0.09 | 0.08 | 74.6 | 4.21 | 0.08 | 4.08 | 26.9 | 0.09 | 0.03 |
| PAF1 | 35.52 | 2.35 | 0.49 | 0.07 | 0.30 | 0.09 | 72.7 | 4.33 | 0.10 | 13.9 | 25.4 | 0.26 | 0.11 |
| PAF2 | 35.52 | 2.33 | 0.38 | 0.05 | 0.23 | 0.09 | 72.4 | 4.01 | 0.09 | 7.54 | 19.1 | 0.18 | 0.08 |
| PAF3 | 35.53 | 2.35 | 0.41 | 0.06 | 0.24 | 0.08 | 64.5 | 4.27 | 0.11 | 10.5 | 18.4 | 0.27 | 0.10 |
| PAF4 | 35.51 | 2.27 | 0.25 | 0.03 | 0.16 | 0.09 | 73.5 | 4.02 | 0.07 | 4.49 | 15.2 | 0.23 | 0.11 |
| PAF5 | 35.53 | 2.52 | 0.34 | 0.04 | 0.22 | 0.08 | 76.5 | 4.26 | 0.10 | 6.36 | 16.7 | 0.19 | 0.08 |
| PAF6 | 35.41 | 2.50 | 0.24 | 0.04 | 0.12 | 0.09 | 74.7 | 4.55 | 0.06 | 5.49 | 17.2 | 0.34 | 0.14 |
| BSF1 | 35.48 | 3.43 | 0.87 | 0.06 | 0.29 | 0.12 | 83.7 | 4.37 | 0.18 | 7.84 | 20.6 | 0.21 | 0.10 |
| BSF2 | 35.49 | 3.63 | 0.87 | 0.07 | 0.31 | 0.12 | 97.7 | 4.55 | 0.23 | 7.26 | 14.5 | 0.17 | 0.10 |
| BSF3 | 35.54 | 2.89 | 0.33 | 0.04 | 0.16 | 0.08 | 70.5 | 4.05 | 0.08 | 4.92 | 19.5 | 0.14 | 0.05 |
| BSF4 | 35.57 | 2.50 | 0.27 | 0.04 | 0.16 | 0.10 | 77.4 | 4.22 | 0.08 | 1.98 | 25.2 | 0.14 | 0.05 |
| BSF5 | 35.56 | 2.58 | 0.18 | 0.04 | 0.17 | 0.10 | 77.7 | 4.27 | 0.08 | 5.86 | 23.8 | 0.22 | 0.08 |
| BSF6 | 35.55 | 2.24 | 0.31 | 0.04 | 0.28 | 0.10 | 74.4 | 4.27 | 0.12 | 6.77 | 26.0 | 0.21 | 0.10 |
| SSF1 | 35.46 | 3.63 | 0.49 | 0.06 | 0.19 | 0.10 | 68.2 | 4.10 | 0.11 | 3.87 | 31.9 | 0.17 | 0.08 |
| SSF2 | 35.48 | 3.32 | 0.60 | 0.07 | 0.19 | 0.11 | 69.1 | 4.51 | 0.08 | 4.58 | 14.9 | 0.15 | 0.09 |
| SSF3 | 35.49 | 3.24 | 0.43 | 0.06 | 0.15 | 0.10 | 76.6 | 4.12 | 0.07 | 3.89 | 27.1 | 0.10 | 0.04 |
| SSF4 | 35.52 | 2.52 | 0.27 | 0.05 | 0.11 | 0.08 | 72.9 | 4.04 | 0.08 | 4.42 | 19.8 | 0.17 | 0.06 |
| SSF5 | 35.49 | 3.52 | 0.34 | 0.06 | 0.16 | 0.09 | 74.4 | 4.48 | 0.16 | 4.25 | 25.1 | 0.14 | 0.05 |
| SSF6 | 35.53 | 2.58 | 0.26 | 0.05 | 0.12 | 0.09 | 72.1 | 4.14 | 0.06 | 3.91 | 16.2 | 0.19 | 0.07 |
| 3BF1 | 35.32 | 7.50 | 1.18 | 0.09 | 0.28 | 0.11 | 87.2 | 4.05 | 0.09 | 7.63 | 22.1 | 0.13 | 0.08 |
| 3BF2 | 35.52 | 2.61 | 0.25 | 0.03 | 0.21 | 0.07 | 80.6 | 4.21 | 0.17 | 3.87 | 26.3 | 0.09 | 0.04 |
| 3BF3 | 35.53 | 3.18 | 0.44 | 0.05 | 0.19 | 0.09 | 86.3 | 4.14 | 0.07 | 3.32 | 42.9 | 0.21 | 0.07 |
| 3BF4 | 35.55 | 2.15 | 0.18 | 0.03 | 0.14 | 0.08 | 72.3 | 4.20 | 0.07 | 6.29 | 23.5 | 0.33 | 0.03 |
| 3BF5 | 35.50 | 3.69 | 0.49 | 0.05 | 0.26 | 0.09 | 83.1 | 4.20 | 0.06 | 4.53 | 24.5 | 0.11 | 0.05 |
| 3BF6 | 35.51 | 2.24 | 0.07 | 0.03 | 0.11 | 0.07 | 78.5 | 4.15 | 0.06 | 5.13 | 27.9 | 0.33 | 0.13 |
| SGH | 35.28 | 7.84 | 1.25 | 0.09 | 0.33 | 0.14 | 86.1 | 3.89 | 0.08 | 3.24 | 1.15 | 0.27 | 0.12 |
| PMO2 | 35.57 | 2.07 | 0.03 | 0.02 | 0.07 | 0.06 | 91.6 | 4.29 | 0.06 | 1.48 | 9.7 | 0.02 | 0.01 |
| PAO1 | 35.58 | 2.24 | 0.09 | 0.03 | 0.07 | 0.06 | 94.1 | 4.21 | 0.06 | 1.98 | 13.1 | 0.10 | 0.04 |
| 3BO | 35.57 | 2.18 | 0.10 | 0.03 | 0.07 | 0.06 | 87.7 | 4.12 | 0.05 | 2.48 | 16.5 | 0.08 | 0.03 |

*nd*: not determined.

**a** For back reef waters, TChl *a* concentrations are issued from the CTD probe.

**Figure S1.** Principal component analysis (PCA), based on the Spearman‘s correlation matrix, applied on salinity and biogeochemical parameters for freshwater samples. Projection of variables (left) and samples (right) on the first factorial plane (PC1 *versus* PC2). SGR: Saint Gilles River, including SGR1, 2 samples; HR: Hermitage River, including HR1, 2 samples; 3BR: Trois-Bassins River, including 3BR1-3 samples; SL: Sand layer groundwater, including SL1, 2 samples; BL: Basalt layer groundwater, including FH, FM, BL1-3 and TE samples. Three groups of samples are highlighted from this PCA (black circles) and confirmed by the hierarchical ascendant classification: G1 = SGR and BL, G2 = 3BR and SL, and G3 = HR.

**Figure S2.** Surface CTD transects of temperature, salinity and total chlorophyll *a* (TChl *a*) concentration in back reef waters. Sites from north to south: TB (**A, F, K**), including TB1-5 samples, CMB (**B, G, L**), including CMB1-5 samples, PAB (**C, H, M**), including PAB1-5 samples, TEB (**D, I, N**), including TEB1-5 samples, and GTB (**E, J, O**), including GTB1-5 samples. For each site, the CTD probe was deployed horizontally at the surface from the beach to reef flat. Spatial interpolation was made using Data-Interpolating Variational Analysis (DIVA) method from Ocean Data View (ODV) software version 4.6.5, Schlitzer, R., http://odv.awi.de, 2014.

**Table S3.** Parameters of the Pearson linear correlations between key variables for each site of the back reef waters. For each site correlation, the number of samples (n) is 5. *Total* is the correlation including all sites together (n = 25). For individual sites, correlations highlighted in light blue are significant (p < 0.05).

|  | **slope** | **y-intercept** | **r** | **p** |
| --- | --- | --- | --- | --- |
|  |  |  |  |  |
| **Salinity *vs* Si(OH)4** |  |  |  |  |
| TB | ‒5.0 | 179 | ‒0.63 | > 0.05 |
| CMB | ‒21.8 | 779 | ‒0.96 | < 0.05 |
| PAB | ‒26.3 | 941 | ‒1.00 | < 0.05 |
| TEB | ‒29.0 | 1034 | ‒1.00 | < 0.05 |
| GTB | ‒38.2 | 1362 | ‒1.00 | < 0.05 |
| *Total****a*** | ‒*29.1* | *1039* | ‒*0.99* | *< 0.05* |
| **Salinity *vs* NO3-** |  |  |  |  |
| TB | ‒0.49 | 18 | ‒0.24 | > 0.05 |
| CMB | ‒1.4 | 49 | ‒0.43 | > 0.05 |
| PAB | ‒7.8 | 276 | ‒1.00 | < 0.05 |
| TEB | ‒7.3 | 260 | ‒1.00 | < 0.05 |
| GTB | ‒12.4 | 442 | ‒0.97 | < 0.05 |
| *Total* | *‒7.8* | *278* | *‒0.96* | *< 0.05* |
| **NO3- *vs* Si(OH)4** |  |  |  |  |
| TB | 0.37 | 2.2 | 0.09 | > 0.05 |
| CMB | 3.1 | 0.6 | 0.44 | > 0.05 |
| PAB | 3.4 | 2.3 | 1.00 | < 0.05 |
| TEB | 4.0 | ‒3.3 | 1.00 | < 0.05 |
| GTB | 3.0 | ‒0.4 | 0.99 | < 0.05 |
| *Total****b*** | *3.6* | *‒0.3* | *0.98* | *< 0.05* |
| **Salinity *vs* NO2-** |  |  |  |  |
| TB | ‒0.002 | 0.14 | ‒0.09 | > 0.05 |
| CMB | ‒0.14 | 5.0 | ‒0.80 | > 0.05 |
| PAB | ‒0.11 | 4.1 | ‒0.99 | < 0.05 |
| TEB | ‒0.03 | 1.4 | ‒0.64 | > 0.05 |
| GTB | ‒0.19 | 6.8 | ‒0.94 | < 0.05 |
| *Total* | *‒0.08* | *2.9* | ‒*0.68* | *< 0.05* |
| **Salinity *vs* DOC** |  |  |  |  |
| TB | 24.8 | ‒817 | 0.33 | > 0.05 |
| CMB | ‒55.3 | 2035 | ‒0.79 | > 0.05 |
| PAB | ‒5.1 | 275 | ‒0.37 | > 0.05 |
| TEB | 3.1 | ‒32 | 0.87 | < 0.05 |
| GTB | 11.5 | ‒330 | 0.35 | > 0.05 |
| *Total* | *‒2.8* | *176* | ‒*0.12* | *> 0.05* |
| **Salinity *vs* humic-like** |  |  |  |  |
| TB | 1.4 | ‒45.3 | 0.21 | > 0.05 |
| CMB | ‒3.8 | 146 | ‒0.14 | > 0.05 |
| PAB | 1.8 | ‒47.9 | 0.24 | > 0.05 |
| TEB | ‒4.2 | 159 | ‒0.70 | > 0.05 |
| GTB | ‒17.5 | 635 | ‒0.95 | < 0.05 |
| *Total* | *‒5.7* | *214* | ‒*0.56* | *< 0.05* |
| **Salinity *vs* tryptophan-like** |  |  |  |  |
| TB | ‒41 | 1481 | ‒0.54 | > 0.05 |
| CMB | 12.5 | -419 | 0.19 | > 0.05 |
| PAB | ‒6.9 | 240 | ‒0.28 | > 0.05 |
| TEB | 30.5 | ‒999 | 0.61 | > 0.05 |
| GTB | ‒116 | 4151 | ‒0.83 | < 0.05 |
| *Total* | *2.0* | *‒27* | *0.03* | *> 0.05* |
| **Salinity *vs* TChl *a*** |  |  |  |  |
| TB | ‒0.13 | 4.6 | ‒0.86 | < 0.05 |
| CMB | ‒0.17 | 6.5 | ‒0.22 | > 0.05 |
| PAB | ‒0.30 | 10.8 | ‒0.78 | > 0.05 |
| TEB | ‒0.06 | 2.6 | ‒0.71 | > 0.05 |
| GTB | ‒0.48 | 17.2 | ‒0.99 | < 0.05 |
| *Total* | *‒0.15* | *5.5* | *‒0.55* | *< 0.05* |

**a** Correlation displayed in **Supplementary Figure S3A**.

**b** Correlation displayed in **Supplementary Figure S3B**.

**Figure S3.** Relationships (Pearson correlations) between salinity and silicate [Si(OH)4] concentration **(A)**, and between nitrate (NO3-) and Si(OH)4 concentrations **(B)** in back reef waters, including TB1-5 samples (orange), CMB1-5 samples (light green), PAB1-5 samples (green), TEB1-5 samples (light blue), and GTB1-5 samples (blue).

**Table S4.** Comparison of concentrations of silicates [Si(OH)4] and nitrates (NO3-) (in µM) in freshwaters (SGR, HR and BL; SL and 3BR not included) and back reef waters (CMB, PAB, TEB, GTB) at salinity 0. For freshwaters, these are concentrations truly measured (actually the mean and associated standard deviation of concentrations measured at each site, which are reported in **Supplementary Table S2**). For back reef waters, these are concentrations extrapolated at each site from the corresponding equation of the linear regression between the variable of interest and salinity, i.e., y-intercept values of the linear regressions presented in **Supplementary Table S3**). Standard deviations of these extrapolated concentrations correspond to standard errors of y-intercept values. TB samples were excluded from back reef samples since they did not show any significant linear correlation between salinity and Si(OH)4 or NO3-, just as CMB samples for the correlation between salinity and NO3- (see **Supplementary Table S3**). Mean concentrations highlighted in light blue or light red on each line are not significantly different according to U-tests (p < 0.05).

|  |  | **Freshwaters** | | |  | **Back reef waters** | | | | |
| --- | --- | --- | --- | --- | --- | --- | --- | --- | --- | --- |
| µM |  | **SGR** | **HR** | **BL** |  | **CMB** | **PAB** | **TEB** | **GTB** | **Total** |
| **Si(OH)4** |  | 697 ± 4 | 739 ± 15 | 1006 ± 138 |  | 779 ± 180 | 941 ± 33 | 1034 ± 25 | 1362 ± 89 | 1039 ± 38 |
| **NO3-** |  | 120 ± 5 | 81 ± 25 | 460 ± 189 |  | - | 276 ± 12 | 260 ± 7 | 442 ± 62 | 278 ± 16 |

**Figure S4.** Box-and-whisker plots for the distribution of the ratio between silicate [Si(OH)4] and nitrate (NO3-) concentrations in back reef waters from north (TB) to south (GTB), and in basalt layer groundwater. TB: Toboggan, including TB1-5 samples (orange); CMB: Club Med, including CMB1-5 samples (light green); PAB: Planch’Alizés, including PAB1-5 samples (green); TEB: Trou d’Eau, including TEB1-5 samples (light blue); GTB: Grand Trou d’Eau, including GTB1-5 samples (blue); Basalt layer, including FH, FM, BL1-3 and TE samples (black). The dotted rectangles bring together on one side, TB, CMB and PAB sites, whose mean ratios are significantly different from that of BL (U-tests p < 0.05), and on the other side TEB, GTB and BL sites, whose mean ratios are not significantly different (U-tests p > 0.05).

**Text S2: Distribution of salinity and biogeochemical parameters in fore reef waters**

Salinity gradually decreased from the north (SGF; 35.58-35.60) to the south (3BF; 35.32-35.55), where it was lower than in oceanic waters (35.57-35.58) (**Figure 4A**). Salinity was indeed significantly lower in the southern part (from CFF to 3BF; 35.51 ± 0.05) than in the northern part of the reef (from SGF to HF; 35.57 ± 0.03) (U-test, p < 0.05) (**Supplementary Figure S6C**), and presented significant differences between the nine sites (H-test, p < 0.05). Moreover, it displayed significantly lower values in surface waters (35.53 ± 0.05) than in waters close to the slope (35.55 ± 0.05) (U-test, p < 0.05) (**Supplementary Figure S6B**). On the other hand, no particular gradient was observed as a function of the distance to the reef front (i.e., between samples collected over depths of 5, 10 or 20 m; 35.52 ± 0.07, 35.55 ± 0.04 and 35.54 ± 0.05, respectively) (**Supplementary Figure S6A**). The salinity gradient between the north and the south was also visible from CTD profiles (**Supplementary Figure S5D-F**).

The Si(OH)4 concentrations were close to those of oceanic waters (2.07-2.24 µM), except for some samples mainly collected in surface waters, especially in poste MNS (PMF1; 3.49 µM) and the Hermitage pass (HF1, 3, 5; 2.98-3.29 µM) and in the southern part of the reef (from CFF to 3BF; up to 7.50 µM at 3BF1) (**Figure 4B**). Si(OH)4 concentration was significantly higher in the south (2.82 ± 1.03 µM) than in the north of the reef (2.37 ± 0.41 µM) (U-test, p < 0.05), with significant differences within the nine sites (H-test, p < 0.05), and was significantly higher in surface waters (2.88 ± 1.08 µM) than onto the slope (2.36 ± 0.36 µM) (U-test, p < 0.05). No gradient with the distance to the reef front was recorded (**Supplementary Figure S6D-F**). Hence, Si(OH)4 presented an inverse evolution to that of salinity for sites PMF, HF, PAF, BSF, SSF and 3BF (**Figure 4B**).

Dissolved nutrient concentrations (NO3-, NO2-, NH4+, PO43-) in the fore reef waters were generally higher than in the oceanic waters (**Figure 4C-F**). NO3- concentration was higher at the surface (0.46 ± 0.24 µM) than onto the slope (0.31 ± 0.18 µM) (U-test, p < 0.05), and decreased rapidly when the distance to the reef front increased (0.56 ± 0.26 µM, 0.34 ± 0.12 µM and 0.25 ± 0.16 µM over 5-, 10- and 20-m depths, respectively) (U-test, p < 0.05) (**Supplementary Figure S6G-H**). In contrast, NO3- concentration did not exhibit any significant difference within the nine sites (H-test, p > 0.05), nor between the southern sites (0.39 ± 0.24 µM) and northern sites (0.38 ± 0.22 µM) (U-test, p > 0.05) (**Figure 4C**; **Supplementary Figure S6I**). The highest NO3- concentrations were recorded in sites 3BF, BSF, HF and PMF.

NO2- and NH4+ concentrations showed a similar pattern to that of NO3-, with higher values in surface waters relative to the bottom, decreasing values with distance to the reef front (U-test, p < 0.05), and no significant difference between the southern and northern sites (U-test, p > 0.05) (**Figure 4D, E**; **Supplementary Figure S6J-O**). Nevertheless, in the case of NH4+, significant differences appeared between sites, with higher concentrations in PMF, HF and BSF compared to TF and CFF (H- and U-tests, p < 0.05).

PO43- concentration was similar at the surface and onto the slope (0.10 ± 0.02 µM) (U-test, p > 0.05), but decreased steadily as the distance to the reef front increased (from 0.11 ± 0.02 µM to 0.09 ± 0.02 µM) (U-test, p < 0.05) (**Figure 4F**; **Supplementary Figure S6P, Q**). It was significantly higher in the northern (0.11 ± 0.02 µM) than in the southern part of the reef (0.09 ± 0.01 µM) (U-test, p < 0.05) (**Supplementary Figure S6R**), with significant differences between the nine sites (H-test, p < 0.05). In particular, there was a discrepancy between the low concentrations observed at PAF and 3BF, and the higher ones recorded at SGF and HF (**Figure 4F**).

DOC concentrations in fore reef waters (62.8-87.2 µM) were clearly lower than in oceanic waters (87.7-94.1 µM), except for one sample (BSF2: 97.7 µM) (**Figure 4G**). They were comparable in surface waters (74.3 ± 6.5 µM) and onto the slope (73.8 ± 6.4 µM) (U-test, p > 0.05) and did not depend on the distance to the reef (U-test, p > 0.05) **Supplementary Figure S7A, B**). However, DOC was significantly higher in the south (76.3 ± 6.5 µM) than in the north (72.4 ± 5.2 µM) (U-test, p < 0.05) (**Supplementary Figure S7C**). Significant differences were also detected between the nine sites (H-test, p < 0.05), with higher concentrations at SGF, BSF, and 3BF sites relative to PMF and HF sites (**Figure 4G**).

DON concentrations in fore reef waters (3.90-4.55 µM) were close to those in oceanic waters (4.12-4.29 µM) and did not display any significant difference, nor between the surface and the slope, nor between the north and the south of the reef (~ 4.21 ± 0.15 µM), neither between the nine sites (U-, H-tests, p > 0.05) (**Figure 4H**; **Supplementary Figure S7E, F**). DON concentration varied moderately with the distance to the reef, with higher values over 20-m depth (**Supplementary Figure S7D**). Urea showed the highest concentrations in southern sites (BSF-3BF; 0.16-0.23 µM) but did not show any significant differences according to surface *versus* slope, north *versus* south of the reef, or distance to the reef front (U-test, p > 0.05) (**Figure 4I**; **Supplementary Figure S7G-I**).

Fluorescence intensity of humic-like fluorophore in fore reef waters (1.5-13.9 QSU) was substantially higher than in oceanic waters (1.5-2.5 QSU) (**Figure 4J**). It was significantly higher in surface waters (6.9 ± 3.3 QSU) than onto the slope (5.1 ± 1.9 QSU) (U-test, p < 0.05), but not significantly different with regard to the distance to the reef front, nor between the southern (5.6 ± 2.3 QSU) and northern sites (6.4 ± 3.3 QSU) (U-test, p > 0.05) (**Supplementary Figure S7J-L**). However, significant differences appeared between the nine sites (H-test, p < 0.05), with the highest fluorescence intensities recorded at PMF, HF and PAF (**Figure 4J**).

Fluorescence intensity of tryptophan-like fluorophore was comparable in surface waters (36.6 ± 26.2 QSU) and onto the slope (28.8 ± 17.6 QSU) (U-test, p > 0.05) and was not dependent on the distance to the reef front (U-test, p > 0.05) (**Figure 4K**; **Supplementary Figure S7M, N**). It nonetheless displayed higher values in the northern sites (44.2 ± 29.4 QSU) compared to the southern ones (23.4 ± 6.4 QSU) (U-test, p < 0.05) (**Supplementary Figure S7O**). Fluorescence intensities were barely higher relative to those of oceanic waters (9.7-16.5 QSU), except for SGF and HF sites, which exhibited the highest values (**Figure 4K**).

TChl *a* concentration was significantly higher in the southern part (0.17 ± 0.08 µg L-1) than in the northern part of the reef (0.09 ± 0.04 µg L-1) (U-test, p < 0.05), but not significantly different at the surface (0.12 ± 0.07 µg L-1) and onto the slope (0.10 ± 0.08 µg L-1) (U-test, p > 0.05) (**Figure 4L**; **Supplementary Figure S7Q, R**). In the south of the reef, it was systematically higher than in oceanic waters (0.02-0.10 µg L-1). Also, TChl *a* concentration was significantly lower over 20-m depth (0.08 ± 0.06 µg L-1) than over 5- and 10-m depths (~ 0.13 ± 0.07 µg L-1) (U-test, p < 0.05) (**Figure 4L**; **Supplementary Figure S7P**). The highest TChl *a* concentrations were encountered at PAF and 3BF sites, in surface but also onto the slope (0.26-0.33 µg L-1 at PAF1, 3, 6 and 3BF4, 6). The TChl *a* gradients can also be seen from CTD profiles (**Supplementary Figure S5G-I**). The latter showed increases from the north to the south, in addition to a decrease from 20-m depth fore reef waters to oceanic waters. Patches of higher TChl *a* concentrations also appeared in depth.

**Figure S5.** CTD profiles of temperature, salinity and total chlorophyll *a* (TChl *a*) concentration in the water column of ~ 10-m depth fore reef waters **(A, D, G)**, ~ 20-m depth fore reef waters **(B, E, H)**, and ≥ 20-m depth oceanic waters **(C, F, I)**. From north to south, sections **(A)**, **(D)** and **(G)** include stations SGH1, SGF3, 4, PMF3, 4, 8, TF7, HF3, 4, 7, CFF3, 4, PAF3, 4, 7, BSF3, 4, SSF3, 4, and 3BF3, 4, 7. From north to south, sections **(B)**, **(E)** and **(H)** include stations SGH2, SGF5, 6, PMF5-7, 9, TF8, CFF5, 6, PAF5, 6, BSF5, 6, SSF5, 6, and 3BF5, 6, 8. From north to south, sections **(C)**, **(F)** and **(I)** include stations SGH3, SGO, PMO1-3, TO, HO, CFO1, 2, PAO1-3, BSO, SSO, and 3BO. Spatial interpolation was made using Data-Interpolating Variational Analysis (DIVA) method from Ocean Data View (ODV) software version 4.6.5, Schlitzer, R., http://odv.awi.de, 2014.

**Figure S6.** Box-and-whisker plots for the distribution of salinity and nutrients in fore reef waters **(A-R)**, according to 1) the distance to the reef front, with samples collected over a water column of 5 m (n° 1, 2), 10 m (n° 3, 4) or 20 m (n° 5, 6) (left column), 2) the sampling depth, with samples collected in surface water (n° 1, 3, 5) or onto the slope (n° 2, 4, 6) (middle column), and 3) the geographical area, with samples collected in the north (in sites SGF, PMF, TF, HF) or in the south of the reef (in sites CFF, PAF, BSF, SSF, 3BF) (right column). The boxes which have different letters **(*a*, *b* or *c*)** have significantly different distribution (U-test, p < 0.05).

**Figure S7.** Box-and-whisker plots for the distribution of organic matter content and TChl *a* concentration in fore reef waters **(A-R)**, according to 1) the distance to the reef front, with samples collected over a water column of 5 m (n° 1, 2), 10 m (n° 3, 4) or 20 m (n° 5, 6) (left column), 2) the sampling depth, with samples collected in surface water (n° 1, 3, 5) or onto the slope (n° 2, 4, 6) (middle column), and 3) the geographical area, with samples collected in the north (in sites SGF, PMF, TF, HF) or in the south of the reef (in sites CFF, PAF, BSF, SSF, 3BF) (right column). The boxes which have different letters **(*a* or *b*)** have significantly different distribution (U-test, p < 0.05).

**Figure S8.** Principal component analysis (PCA), based on the Spearman‘s correlation matrix, applied on salinity and biogeochemical parameters for fore reef and oceanic water samples. Projection of variables (left) and samples (right) on the first factorial plane (PC1 *versus* PC2). SGF: Saint Gilles River, including SGF1-6 samples (dark red); PMF: Poste MNS, including PMF1-6 samples (red); TF: Toboggan, including TF1-6 samples (orange); HF: Hermitage, including HF1-6 samples (yellow); CFF: Camp des Finances, including CFF1-6 samples (light green); PAF: Planch’Alizés, including PAF1-6 samples (green); BSF: BS4, including BSF1-6 samples (light blue); SSF: Sud Sanctuaire, including SSF1-6 samples (blue); 3BF: Trois-Bassins, including 3BF1-6 samples (dark blue); Oceanic water, including PMO2 (Poste MNS), PAO1 (Planch’Alizés) and 3BO (Trois-Bassins) samples (black). Fore reef samples n° 1 = 5-m depth – surface (circle); n° 2 = 5-m depth – slope (square); n° 3 = 10-m depth – surface (triangle); n° 4 = 10-m depth – slope (diamond); n° 5 = 20-m depth – surface (cross); n° 6 = 20-m depth – slope (lined cross). Five groups of samples are highlighted from this PCA (black circles) and confirmed by the hierarchical ascendant classification: G1 = 3BF1; G2 = BSF1, 2; G3 = PMF1, 4, PAF1-6, BSF3, 5, 6, SSF1-6, 3BF2-6; G4 = SGF2, 4, 6, PMF2, 6, TF1-6, HF6, CFF1-6, BSF4, PMO2, PAO1, 3BO; G5 = SGF1, 3, 5, PMF3, 5, HF1-5.

**Table S5.** Parameters of the Pearson linear correlations between key variables for each site of the fore reef waters. For each correlation, the number of samples (n) is 9, including 6 fore reef samples (samples n° 1-6) and 3 oceanic samples (PMO2, PAO1 and 3BO). Correlations highlighted in light blue displayed the highest r values (the 3 or 4 highest values by parameters). *Total* is the correlation including all sites (n = 9 sites × 6 fore reef samples + 3 oceanic samples = 57).

|  | **slope** | **y-intercept** | **r** | **p** |
| --- | --- | --- | --- | --- |
|  |  |  |  |  |
| **Salinity *vs* Si(OH)4** |  |  |  |  |
| SGF | ‒4.6 | 166 | ‒0.49 | > 0.05 |
| PMF | ‒13.6 | 487 | ‒0.92 | < 0.05 |
| TF | 0.9 | ‒30 | ‒0.35 | > 0.05 |
| HF | ‒9.9 | 355 | ‒0.77 | < 0.05 |
| CFF | ‒0.03 | 3.2 | ‒0.04 | > 0.05 |
| PAF | ‒1.9 | 72 | ‒0.71 | < 0.05 |
| BSF | ‒14.4 | 514 | ‒0.92 | < 0.05 |
| SSF | ‒13.3 | 476 | ‒0.96 | < 0.05 |
| 3BF**a** | ‒21.5 | 767 | ‒0.97 | < 0.05 |
| *Total****a,b*** | ‒*13.7* | *490* | ‒*0.81* | *< 0.05* |
| **Salinity *vs* NO3-** |  |  |  |  |
| SGF | ‒3.3 | 118 | ‒0.22 | > 0.05 |
| PMF | ‒5.9 | 212 | ‒0.67 | < 0.05 |
| TF | 1.8 | ‒65 | 0.35 | > 0.05 |
| HF | ‒3.8 | 136 | ‒0.48 | > 0.05 |
| CFF | ‒0.3 | 10 | ‒0.05 | > 0.05 |
| PAF | ‒1.2 | 44 | ‒0.40 | > 0.05 |
| BSF | ‒8.6 | 307 | ‒0.97 | < 0.05 |
| SSF | ‒4.2 | 148 | ‒0.94 | < 0.05 |
| 3BF | ‒4.2 | 156 | ‒0.95 | < 0.05 |
| *Total****b*** | *‒2.6* | *92* | *‒0.54* | *< 0.05* |
| **Salinity *vs* NO2-** |  |  |  |  |
| SGF | ‒0.4 | 13 | ‒0.31 | > 0.05 |
| PMF | ‒0.13 | 4.7 | ‒0.28 | > 0.05 |
| TF | 0.01 | ‒0.31 | 0.03 | > 0.05 |
| HF | ‒0.61 | 22 | ‒0.71 | < 0.05 |
| CFF | ‒0.07 | 2.4 | ‒0.14 | > 0.05 |
| PAF | ‒0.10 | 3.6 | ‒0.31 | > 0.05 |
| BSF | ‒0.41 | 15 | ‒0.93 | < 0.05 |
| SSF | ‒0.36 | 13 | ‒0.96 | < 0.05 |
| 3BF | ‒0.27 | 9.5 | ‒0.96 | < 0.05 |
| *Total****b*** | *‒0.18* | *6.3* | ‒*0.49* | *< 0.05* |
| **Salinity *vs* NH4+** |  |  |  |  |
| SGF | 0.5 | ‒17 | 0.08 | > 0.05 |
| PMF | ‒0.13 | 4.7 | ‒0.03 | > 0.05 |
| TF | 0.02 | ‒0.8 | 0.02 | > 0.05 |
| HF | ‒1.9 | 67 | ‒0.61 | < 0.05 |
| CFF | ‒0.3 | 10.7 | ‒0.20 | > 0.05 |
| PAF | ‒0.5 | 16 | ‒0.28 | > 0.05 |
| BSF | ‒2.3 | 82 | ‒0.85 | < 0.05 |
| SSF | ‒1.1 | 38 | ‒0.98 | < 0.05 |
| 3BF | ‒0.8 | 29 | ‒0.78 | < 0.05 |
| *Total* | *‒0.23* | *8.4* | *‒0.16* | *> 0.05* |
| **Salinity *vs* PO43-** |  |  |  |  |
| SGF | 0.34 | ‒11.9 | 0.15 | > 0.05 |
| PMF | 0.009 | ‒0.24 | 0.01 | > 0.05 |
| TF | 0.14 | ‒4.9 | 0.17 | > 0.05 |
| HF | ‒0.23 | 8.4 | ‒0.26 | > 0.05 |
| CFF | ‒0.17 | 6.3 | ‒0.21 | > 0.05 |
| PAF | ‒0.21 | 7.4 | ‒0.76 | < 0.05 |
| BSF | ‒0.58 | 21 | ‒0.84 | < 0.05 |
| SSF | ‒0.39 | 14 | ‒0.95 | < 0.05 |
| 3BF | ‒0.17 | 6 | ‒0.82 | < 0.05 |
| *Total* | *0.026* | *‒0.83* | *0.07* | *> 0.05* |
| **Salinity *vs* DOC** |  |  |  |  |
| SGF | ‒203 | 7301 | ‒0.33 | > 0.05 |
| PMF | ‒38 | 1429 | ‒0.10 | > 0.05 |
| TF | 19.8 | ‒625 | 0.05 | > 0.05 |
| HF | ‒23.9 | 925 | ‒0.07 | > 0.05 |
| CFF | 177 | ‒6229 | 0.58 | > 0.05 |
| PAF | 112 | ‒3902 | 0.58 | > 0.05 |
| BSF | ‒26.6 | 1030 | ‒0.10 | > 0.05 |
| SSF | 198 | ‒6939 | 0.89 | < 0.05 |
| 3BF | 7.1 | ‒171 | 0.08 | > 0.05 |
| *Total* | *‒35.1* | *1337* | *‒0.25* | *> 0.05* |
| **Salinity *vs* humic-like** |  |  |  |  |
| SGF | ‒30 | 1069 | ‒0.15 | > 0.05 |
| PMF | ‒14 | 509 | ‒0.12 | > 0.05 |
| TF | ‒6 | 2014 | ‒0.14 | > 0.05 |
| HF | ‒56 | 2004 | ‒0.47 | > 0.05 |
| CFF | ‒33 | 1171 | ‒0.56 | > 0.05 |
| PAF | ‒25 | 899 | ‒0.32 | > 0.05 |
| BSF | ‒60 | 2138 | ‒0.85 | < 0.05 |
| SSF | ‒21 | 758 | ‒0.83 | < 0.05 |
| 3BF | ‒21 | 735 | ‒0.79 | < 0.05 |
| *Total* | *‒6* | *234* | *‒0.12* | *> 0.05* |
| **Salinity *vs* tryptophan-like** |  |  |  |  |
| SGF | 473 | ‒16806 | 0.21 | > 0.05 |
| PMF | 3 | ‒86 | 0.01 | > 0.05 |
| TF | ‒216 | 7717 | ‒0.53 | > 0.05 |
| HF | ‒287 | 1062 | ‒0.25 | > 0.05 |
| CFF | ‒247 | 8815 | ‒0.80 | < 0.05 |
| PAF | ‒30 | 1075 | ‒0.36 | > 0.05 |
| BSF | ‒15 | 558 | ‒0.10 | > 0.05 |
| SSF | ‒129 | 4607 | ‒0.79 | < 0.05 |
| 3BF | ‒28 | 1015 | ‒0.23 | > 0.05 |
| *Total* | *87* | *‒3053* | *0.20* | *> 0.05* |
| **NO3- *vs* Si(OH)4** |  |  |  |  |
| SGF | 0.5 | 2.1 | 0.76 | < 0.05 |
| PMF | 1.4 | 1.9 | 0.85 | < 0.05 |
| TF | 0.3 | 2.1 | 0.54 | > 0.05 |
| HF | 1.3 | 2.0 | 0.81 | < 0.05 |
| CFF | ‒0.03 | 2.2 | ‒0.11 | > 0.05 |
| PAF | 0.6 | 2.2 | 0.65 | < 0.05 |
| BSF | 1.7 | 2.1 | 0.95 | < 0.05 |
| SSF | 2.8 | 2.0 | 0.90 | < 0.05 |
| 3BF**a** | 4.7 | 1.6 | 0.98 | < 0.05 |
| *Total****a*** | *2.6* | *1.6* | *0.73* | *< 0.05* |
| **NO3- *vs* NO2-** |  |  |  |  |
| SGF | 0.07 | 0.02 | 0.93 | < 0.05 |
| PMF | 0.04 | 0.03 | 0.83 | < 0.05 |
| TF | 0.05 | 0.03 | 0.88 | < 0.05 |
| HF | 0.10 | 0.01 | 0.95 | < 0.05 |
| CFF | 0.08 | 0.02 | 0.93 | < 0.05 |
| PAF | 0.10 | 0.02 | 0.94 | < 0.05 |
| BSF | 0.05 | 0.02 | 0.98 | < 0.05 |
| SSF | 0.08 | 0.02 | 0.97 | < 0.05 |
| 3BF**a** | 0.06 | 0.02 | 0.99 | < 0.05 |
| *Total****a*** | *0.06* | *0.03* | *0.84* | *< 0.05* |
| **NO3- *vs* NH4+** |  |  |  |  |
| SGF | 0.37 | 0.07 | 0.91 | < 0.05 |
| PMF | 0.34 | 0.10 | 0.75 | < 0.05 |
| TF | 0.17 | 0.06 | 0.89 | < 0.05 |
| HF | 0.38 | 0.04 | 0.97 | < 0.05 |
| CFF | 0.25 | 0.06 | 0.97 | < 0.05 |
| PAF**a** | 0.53 | 0.03 | 0.99 | < 0.05 |
| BSF | 0.26 | 0.09 | 0.87 | < 0.05 |
| SSF | 0.24 | 0.06 | 0.97 | < 0.05 |
| 3BF | 0.19 | 0.09 | 0.84 | < 0.05 |
| *Total****a*** | *0.24* | *0.09* | *0.73* | *< 0.05* |
| **NH4+ *vs* humic-like** |  |  |  |  |
| SGF | 20.2 | 0.3 | 0.64 | < 0.05 |
| PMF | 26.3 | 0.8 | 0.90 | < 0.05 |
| TF | 26.2 | 0.5 | 0.69 | < 0.05 |
| HF**a** | 37.2 | 0.3 | 0.94 | < 0.05 |
| CFF | 30.4 | 0.6 | 0.78 | < 0.05 |
| PAF | 45.4 | ‒1.5 | 0.94 | < 0.05 |
| BSF | 23.8 | 0.3 | 0.91 | < 0.05 |
| SSF | 19.4 | 1.0 | 0.82 | < 0.05 |
| 3BF | 17.0 | 1.4 | 0.68 | < 0.05 |
| *Total****a*** | *26.8* | *0.8* | *0.73* | *< 0.05* |
| **PO43- *vs* tryptophan-like** |  |  |  |  |
| SGF | 687 | ‒26 | 0.70 | < 0.05 |
| PMF | 252 | ‒1.6 | 0.80 | < 0.05 |
| TF | 179 | 7.1 | 0.37 | > 0.05 |
| HF**a** | 1026 | ‒51 | 0.81 | < 0.05 |
| CFF | 173 | 7.3 | 0.47 | > 0.05 |
| PAF | 189 | 1.9 | 0.62 | > 0.05 |
| BSF | 113 | 8.7 | 0.50 | > 0.05 |
| SSF | 257 | ‒2.0 | 0.64 | > 0.05 |
| 3BF | 312 | ‒0.9 | 0.52 | > 0.05 |
| *Total****a*** | *611* | ‒*28* | *0.51* | *< 0.05* |

**a** Correlations shown in **Figure 5**.

**b** Excluding PAF6 sample (i.e., n = 56).
